# Supplementary material for: The Ratio of Toxic-to-Nontoxic miRNAs Predicts Platinum Sensitivity in Ovarian Cancer
Source: PubMed Central journal article supplement — Cancer Res. 2021 Jun 15;81(15):3985–4000. doi: 10.1158/0008-5472.CAN-21-0953 (PMC8338879; doi:10.1158/0008-5472.can-21-0953), 2021-06-15
Supplement: NIHMS1717893-supplement-3.pdf [file NIHMS1717893-supplement-3.pdf]

## **Supplemental Tables S1 and S2**

### **The ratio of toxic-to-nontoxic microRNAs predicts platinum sensitivity in ovarian cancer**

Monal Patel, Yinu Wang, Elizabeth T. Bartom, Rohin Dhir, Kenneth P. Nephew,  
Daniela Matei, Andrea E. Murmann, Ernst Lengyel, and Marcus E. Peter

**Table S1: miRNAs involved in therapy resistance or associated with negative treatment outcome in OC**

| Main miRNA                  | Other miRNAs                              | Treatment                                   | OvCa cell lines                                                                                                                       | Type of OvCa-patient sample                                             | Clinical data/relevance | Identified miRNA target | Ref. |
|-----------------------------|-------------------------------------------|---------------------------------------------|---------------------------------------------------------------------------------------------------------------------------------------|-------------------------------------------------------------------------|-------------------------|-------------------------|------|
| miR-17~92 cluster           | -                                         | Taxol                                       | SKOV3 and Taxol-resistant SKOV3-TR30                                                                                                  | -                                                                       | -                       | BMI                     | 1    |
| miR-17-5p                   | -                                         | Taxol                                       | OVCAR3, SKOV3                                                                                                                         | -                                                                       | -                       | PTEN                    | 93   |
| miR-21                      | -                                         | Cisplatin                                   | A2780R (Cis resistant)                                                                                                                | -                                                                       | -                       | -                       | 2    |
| miR-21-3p                   | >20 other miRNAs                          | Cisplatin                                   | A2780, A2780-CP70, OVCAR5, OVCAR8 and IGROV1                                                                                          | Publicly available datasets                                             | Yes                     | NAV3                    | 3    |
| miR-21-5p                   | -                                         | Taxol                                       | A2780, PEA1, PEA2, ALST, OVCAR432, OVCAR433, HeyA8, HeyA8-MDR, SKOV3ip, SKOV3-TR, SKOV3, cancer associated fibroblasts and adipocytes | OvCa                                                                    | Yes                     | APAF1                   | 4    |
| miR-21-5p                   | -                                         | Cisplatin                                   | A2780, A2780- Cp resistant, SKOV-3                                                                                                    | Recurrent patients enrolled in TCGA                                     | Yes                     | PDCD4                   | 5    |
| miR-21-5p                   | 320 other miRNAs                          | Cisplatin                                   | SKOV3ip1, HeyA8, A2780, A2780CP20                                                                                                     | -                                                                       | -                       | PDCD4                   | 6    |
| miR-27a                     | -                                         | Taxol                                       | A2780 and A2780/Taxol resistant cells                                                                                                 | -                                                                       | -                       | HIPK2                   | 7    |
| miR-31                      | -                                         | Cisplatin                                   | OVCAR5, A2780 and its cisplatin-resistant derivatives, MCP1, CP70                                                                     | Publicly available datasets                                             | Yes                     | KCNMA1                  | 8    |
| miR-93-5p                   | 7 other miRNAs                            | Cisplatin                                   | OVCAR3, SKOV3, OVCAR3/CDDP, SKOV3/CDDP                                                                                                | OvCa                                                                    | Yes                     | PTEN                    | 94   |
| miR-98-5p                   | let-7c-5p, let-7e-5p, let-7g-5p           | Cisplatin                                   | C13*, OV2008, A2780, HO8910, SKOV3, CaOV3, Hey, COV362,                                                                               | Epithelial OvCa                                                         | Yes                     | Dicer1                  | 9    |
| miR-106a-5p                 | -                                         | Cisplatin                                   | OVCAR3, OVCAR3/CIS                                                                                                                    | -                                                                       | -                       | PDCD4                   | 95   |
| miR-106a-5p                 | miR-96, miR-629                           | Taxol                                       | SKOV3 and PTX resistant SKOV3 sublines                                                                                                | Ovarian serous tumors                                                   | Yes                     | BCL10, CASP-7           | 10   |
| miR-125b-5p                 | -                                         | Cisplatin                                   | OV2008 and its resistant variant (C13*)                                                                                               | -                                                                       | -                       | Bak1                    | 11   |
| miR-125b-2-3p               | miR-126-5p                                | Cisplatin                                   | A2780, A2780CIS, A2780TC1, A2780TC3                                                                                                   | -                                                                       | -                       | -                       | 15   |
| miR-129-5p                  | -                                         | Taxol                                       | SKOV3, SKOV3/PTX, HeyA8, HeyA8/PTX                                                                                                    | -                                                                       | -                       | ABCB                    | 12   |
| miR-130a                    | miR-374a, miR-146a, miR-182 and 32 others | Cisplatin                                   | A2780, A2780/DDP                                                                                                                      | -                                                                       | -                       | MDR-1/P-gp/PTEN         | 13   |
| miR-130a                    | 54 other miRNAs                           | Cisplatin                                   | SKOV3, SKOV3/CIS                                                                                                                      | -                                                                       | -                       | MDR1/P-gp               | 14   |
| miR-130b                    | -                                         | Cisplatin, Taxol                            | A2780, A2780/Taxol                                                                                                                    | -                                                                       | -                       | -                       | 96   |
| miR-141-3p                  | 5 other miRNAs                            | Cisplatin                                   | A2780 and A2780 DDP, TOV112D, TOV21G, OV56, OAW42                                                                                     | Non-serous tumors                                                       | Yes                     | KEAP1                   | 16   |
| miR-149-5p                  | -                                         | Cisplatin                                   | TOV-21G, A2780, OVCAR-3, Caov-3, ES-2, HO-8910, SK-OV-3                                                                               | Ovarian serous cystadenocarcinoma, benign ovarian lesions, TCGA dataset | Yes                     | Hippo signaling pathway | 18   |
| miR-197-3p                  | -                                         | Taxol                                       | A2780, SKOV3, A2780/Tax                                                                                                               | -                                                                       | -                       | NLK                     | 20   |
| miR-200c-with cytosolic HuR | -                                         | Cisplatin, Taxol, Patupilone                | -                                                                                                                                     | OvCa patients                                                           | Yes                     | -                       | 113  |
| miR-214                     | miR-100, miR-199a-3p, miR-200a            | Cisplatin                                   | A2780S, A2780CP, OV119                                                                                                                | Primary OvCa                                                            | Yes                     | PTEN                    | 97   |
| miR-214-3p                  | -                                         | Cisplatin                                   | A2780, A2780cp, OVCAR-3, SKOV3                                                                                                        | -                                                                       | -                       | MEG3                    | 21   |
| miR-216a-5p                 | -                                         | Cisplatin                                   | SKOV3, SKOV3 CR, OVCA433                                                                                                              | -                                                                       | -                       | PTEN                    | 22   |
| miR-224-5p                  | -                                         | Cisplatin                                   | A2780CP/A2780S, C13/OV2008                                                                                                            | Ovarian papillary serous carcinoma                                      | Yes                     | PRKCD                   | 23   |
| miR-363-3p                  | -                                         | Taxol                                       | SKOV3, KF, KF-TX, OVTOKO                                                                                                              | OvCa                                                                    | Yes                     | LATS2                   | 24   |
| miR-376c-3p                 | -                                         | Cisplatin, Carboplatin                      | OV2008, A2780                                                                                                                         | Serous OvCa                                                             | Yes                     | ALK7                    | 98   |
| miR-433                     | -                                         | Taxol                                       | A2780, PEO1, PEO4                                                                                                                     | -                                                                       | -                       | CDK6                    | 25   |
| miR-483-3p                  | -                                         | Cisplatin, Oxiplatin                        | IGROV-1, IGROV-1/Pt1, IGROV-1/OHP, A2780, A2780/CP, OVCAR5, OVCAR5/Pt                                                                 | GEO datasets                                                            | Yes                     | PRKCA                   | 99   |
| miR-490-3p                  | -                                         | Taxol                                       | A2780, A2780/Taxol                                                                                                                    | -                                                                       | -                       | -                       | 100  |
| miR-493-3p                  | -                                         | Taxol                                       | CAOV- 3, OVCAR-8                                                                                                                      | High grade serous OvCa                                                  | Yes                     | Mad2                    | 26   |
| miR-493-5p                  | 7 other miRNAs                            | PARPi, Platinum                             | BRCA2 mutant KURAMOCHI, OVSAHO, and VU423 cells                                                                                       | BrCa2 mutated OvCa, TCGA cohort                                         | Yes                     | RNASEH2A, FEN1, SSRP1   | 27   |
| miR-520g-3p                 | -                                         | Cisplatin, Taxol                            | A2780, SKOV3, OVA433, ES-2, OV2008, CaOV-3, MCAS, OVK17                                                                               | Epithelial OvCa                                                         | Yes                     | DAPK2                   | 117  |
| miR-551b-3p                 | -                                         | Cisplatin                                   | Side population from primary ascites-derived OvCa cells, SKOV3, 8910                                                                  | OvCa                                                                    | Yes                     | Foxo3, TRIM31           | 28   |
| miR-622                     | -                                         | Taxol, Carboplatin                          | -                                                                                                                                     | High grade serous OvCa                                                  | Yes                     | -                       | 89   |
| miR-622                     | -                                         | Cisplatin, Carboplatin, Olaparib, Veliparib | UWB1.289                                                                                                                              | OvCa datasets                                                           | Yes                     | Ku Complex              | 101  |
| miR-630                     | -                                         | Taxol                                       | SKOV3 and SKOV3-TR                                                                                                                    | -                                                                       | -                       | APAF-1                  | 29   |
| miR-1307                    | -                                         | Cisplatin, Taxol                            | SKOV3 and SKOV3- TR30                                                                                                                 | Ovarian serous cystadenocarcinoma                                       | Yes                     | DAPK3                   | 32   |
| miR-1307                    | -                                         | Taxol                                       | SKOV3, A2780, A2780/Taxol                                                                                                             | -                                                                       | -                       | ING5                    | 33   |
| let-7e                      | -                                         | Taxol                                       | A2780, A2780TAX                                                                                                                       | -                                                                       | -                       | -                       | 15   |

**Supplemental Table S1:** List of miRNAs shown to be involved in therapy resistance or associated with negative treatment outcome in OC. Each row consists of a main miRNA and other miRNAs studied in a published article as well as other details from the study.

**Table S2: miRNAs that can sensitize OvCa cells to therapy or are associated with positive treatment outcome in OC**

| Main miRNA             | Other miRNAs              | Treatment                         | OvCa cell lines                                                                                         | Type of OvCa-patient sample                                            | Clinical data/relevance | Identified miRNA target          | Ref. |
|------------------------|---------------------------|-----------------------------------|---------------------------------------------------------------------------------------------------------|------------------------------------------------------------------------|-------------------------|----------------------------------|------|
| miR-7-5p               | -                         | Taxol                             | HO8910pm                                                                                                | -                                                                      | -                       | EGFR, ERK pathway                | 43   |
| miR-9                  | miR-145, miR-429, miR-26a | Cisplatin                         | Primary ovarian tumor cells                                                                             | Serous epithelial OvCa                                                 | Yes                     | -                                | 44   |
| miR-9-5p               | -                         | Cisplatin, PARP1 inhibitor        | OV2008, C13*, SKOV3, A2780, CaOV3                                                                       | Serous OvCa                                                            | Yes                     | BRCA1                            | 45   |
| miR-15a-5p, miR-16-5p  | -                         | Cisplatin                         | A2780, A2780- CP20, OVSAHO, OVCAR4, OSE tsT/hTERT                                                       | High grade serous OvCa                                                 | Yes                     | BMI1                             | 46   |
| miR-18a-3p             | miR-15a-5p, miR-25-3p     | Docetaxel                         | SKOV3IP1, HeyA8, HeyA8-MDR, A2780, A2780CP20                                                            | High grade serous OvCa                                                 | Yes                     | K-RAS                            | 42   |
| miR-29                 | -                         | Cisplatin                         | CP-70, A2780, HeyAC2, SKOV-3                                                                            | -                                                                      | -                       | COL1A1                           | 37   |
| miR-29b                | -                         | Taxol, Platinum, Cyclophosphamide | OVCAR3                                                                                                  | High grade serous, clear cell, and mucinous ovarian adenocarcinomas    | Yes                     | MAPK10, ATG9A                    | 38   |
| miR-29b                | miR-7, miR-18a, miR-19a   | Taxol                             | ES2, AMOC2                                                                                              | Epithelial OvCa                                                        | Yes                     | Mcl-1                            | 39   |
| miR-30a/c-5p           | -                         | Cisplatin                         | A2780, A2780/CP70                                                                                       | -                                                                      | -                       | DNMT1, Snail                     | 103  |
| miR-31                 | -                         | Taxol, Carboplatin                | KFrHuman KF OvCa cells and KFr13 cisplatin-resistant KF13, SK-OV-3, OVCAR-3, TU-OM-144                  | Serous OvCa                                                            | Yes                     | MET                              | 40   |
| miR-34c-5p             | -                         | Carboplatin, Docetaxel            | OVS1, SKOV-I6                                                                                           | Ovarian serous cystadenocarcinoma                                      | Yes                     | AREG                             | 41   |
| miR-100                | -                         | Cisplatin                         | SKOV3, SKOV3/DDP                                                                                        | -                                                                      | -                       | mTOR, PLK1                       | 47   |
| miR-101-3p             | -                         | Cisplatin                         | A2780, A2780/DDP, SKOV3, SKOV3/DDP                                                                      | Epithelial OvCa                                                        | Yes                     | EZH2                             | 48   |
| miR-106a-5p            | -                         | Cisplatin                         | A2780, A2780/DDP                                                                                        | -                                                                      | -                       | MCL1                             | 49   |
| miR-125b-2-3p          | -                         | Taxol                             | A2780, A2780TAX                                                                                         | -                                                                      | -                       | -                                | 15   |
| miR-128                | -                         | Cisplatin                         | SKOV3, SKOV3/CP                                                                                         | -                                                                      | -                       | ABCC5, BMI1                      | 50   |
| miR-130a-3p            | -                         | Cisplatin                         | A2780, A2780/DDP                                                                                        | -                                                                      | -                       | XIAP                             | 104  |
| miR-130a-3p            | let-7e, miR-335           | Cisplatin                         | A2780, A2780CIS, A2780TC1, A2780TC3                                                                     | -                                                                      | -                       | M-CSF                            | 15   |
| miR-130b-3p            | -                         | Taxol, Cisplatin                  | A2780, A2780/CP, A2780/TAX, SKOV3, SKOV3/ TAX                                                           | Malignant and benign OvCa                                              | Yes                     | CSF-1                            | 51   |
| miR-133b-3p            | -                         | Taxol, Cisplatin                  | A2780, A2780/DDP, A2780/Taxol, OVCAR3                                                                   | OvCa                                                                   | Yes                     | GST- $\pi$ , MDR1                | 52   |
| miR-134 cluster        | -                         | Taxol                             | SKOV3, Taxol-resistant SKOV3-TR30                                                                       | -                                                                      | -                       | c-Myc                            | 1    |
| miR-134-5p             | -                         | Taxol                             | SKOV3, Taxol-resistant SKOV3-TR30                                                                       | Serous epithelial OvCa                                                 | Yes                     | TAB1                             | 53   |
| miR-134-5p             | -                         | Taxol                             | SKOV3, Taxol-resistant SKOV3-TR30                                                                       | Serous epithelial OvCa                                                 | Yes                     | Pak2                             | 54   |
| miR-136-5p             | -                         | Taxol                             | SKOV3 & its PTX-resistant sublines                                                                      | High grade serous OvCa                                                 | Yes                     | Notch3                           | 105  |
| miR-136                | -                         | Cisplatin                         | OV2008, C13                                                                                             | Epithelial OvCa                                                        | Yes                     | -                                | 55   |
| miR-137                | -                         | Cisplatin                         | PEO1, PEO4, IGROV1, OV90, IGROV1 CR, OV90 CR                                                            | OvCa                                                                   | Yes                     | EZH2                             | 56   |
| miR-139-5p             | -                         | Cisplatin                         | CAOV3, SNU119, CAOV3/cDDP, SNU119/cDDP                                                                  | OvCa                                                                   | Yes                     | ATP7A/B                          | 57   |
| miR-139-5p             | -                         | Cisplatin                         | SKOV3, A2780, SKOV3-R, A2780-R                                                                          | -                                                                      | -                       | c-Jun                            | 58   |
| miR-141, miR-200a      | -                         | Taxol                             | SKOV3                                                                                                   | OvCa patient, publicly available datasets                              | Yes                     | -                                | 116  |
| miR-142-5p             | -                         | Cisplatin                         | OVCAR3, SKOV3                                                                                           | Epithelial OvCa                                                        | Yes                     | XIAP1, BIRC3, BCL2, BCL2L2, MCL1 | 59   |
| miR-145-5p             | -                         | Taxol                             | A2780, SKOV3, A2780/PTX, SKOV3/PTX                                                                      | Serous epithelial OvCa                                                 | Yes                     | Sp1, Cdk6, P-gp, pRb             | 17   |
| miR-146a-5p            | -                         | Cisplatin                         | OVCAR3, SKOV3                                                                                           | Primary epithelial OvCa cells from freshly collected malignant ascites | Yes                     | XIAP, BCL2L2 and BIRC5           | 60   |
| miR-146b-5p            | -                         | Taxol, Cisplatin                  | SKOV3, HO8910, A2780, OVCAR-3                                                                           | Epithelial OvCa                                                        | Yes                     | FBXL10                           | 61   |
| miR-149-5p             | -                         | Taxol                             | A2780                                                                                                   | -                                                                      | -                       | MyD88                            | 19   |
| miR-152-3p             | -                         | Cisplatin                         | C13*, OV2008, A2780, HO8910, SKOV3, CaOV3, Hey, COV362,                                                 | Epithelial OvCa                                                        | Yes                     | -                                | 9    |
| miR-152-3p, miR-185-5p | -                         | Cisplatin                         | SKOV3, A2780, A2780/DDP, SKOV3/DDP                                                                      | -                                                                      | -                       | DNMT1                            | 62   |
| miR-155-5p             | -                         | Cisplatin                         | SKOV3, A2780                                                                                            | Primary epithelial OvCa cells from freshly collected malignant ascites | Yes                     | XIAP                             | 63   |
| miR-182                | -                         | Platinum                          | -                                                                                                       | High grade serous OvCa                                                 | Yes                     | -                                | 64   |
| miR-186-5p             | -                         | Cisplatin                         | A2780, OV2008, OVCAR3, SKOV3, CAOV3, the related cDDP-resistant cell lines (ACRP, C13* and OVCAR3/ DDP) | Serous OvCa                                                            | Yes                     | Twist1                           | 65   |
| miR-186-5p             | -                         | Taxol, Cisplatin                  | OVCAR3, A2780, A2780/DDP, A2780/Taxol                                                                   | -                                                                      | -                       | ABC1                             | 66   |

| Table S2, cont.: miRNAs that can sensitize OvCa cells to therapy or are associated with positive treatment outcome in OC |                |                                                                    |                                                                     |                                                                                          |                         |                                |      |
|--------------------------------------------------------------------------------------------------------------------------|----------------|--------------------------------------------------------------------|---------------------------------------------------------------------|------------------------------------------------------------------------------------------|-------------------------|--------------------------------|------|
| Main miRNA                                                                                                               | Other miRNAs   | Treatment                                                          | OvCa cell lines                                                     | Type of OvCa-patient sample                                                              | Clinical data/relevance | Identified miRNA target        | Ref. |
| miR-199a                                                                                                                 | -              | Taxol, Cisplatin, Adriamycin                                       | CD44+/CD117+ ovarian tumor cells from inpatient clinic patients     | Epithelial OvCa                                                                          | Yes                     | CD44                           | 67   |
| miR-199a-3p                                                                                                              | -              | Cisplatin                                                          | SKOV3, SKOV3-CDDP                                                   | OvCa                                                                                     | Yes                     | ITGB8                          | 68   |
| miR-199-3p                                                                                                               | -              | Cisplatin, 5Aza-dC                                                 | SKOV3, HO-8910, IOSE386 (immortalized ovarian epithelial cell line) | Epithelial OvCa                                                                          | Yes                     | DDR1                           | 106  |
| miR-199b-5p                                                                                                              | -              | Cisplatin                                                          | A2780s, A2780cp, OV2008, C13*, SKOV3, OVCA433, ES-2                 | Epithelial OvCa                                                                          | Yes                     | JAG1                           | 69   |
| miR-200 family                                                                                                           | -              | Taxol                                                              | -                                                                   | OvCa                                                                                     | Yes                     | $\beta$ -tubulin III           | 114  |
| miR-200a                                                                                                                 | -              | Taxol                                                              | OVCAR3                                                              | -                                                                                        | -                       | -                              | 115  |
| miR-200b, miR-200c                                                                                                       | -              | Cisplatin                                                          | HIOSE-80, MCC-3, SKOV3, A2780CP, A2780, OV119                       | Primary ovarian tumor                                                                    | Yes                     | DNMTs                          | 70   |
| miR-200c                                                                                                                 | -              | Taxol                                                              | HEY, SKOV3, OVCA 420, OV 1847, OVCA 433                             | Serous OvCa                                                                              | Yes                     | TUBB3                          | 71   |
| miR-200c-3p                                                                                                              | -              | Cisplatin, Olaparib                                                | UWB1.289, UWB1.289-BRCA and SKOV3                                   | Serous and mucinous carcinomas                                                           | Yes                     | Neuropilin 1                   | 72   |
| miR-200c-3p                                                                                                              | -              | Cisplatin, Taxol, Doxorubicin, Mitomycin C, Vincristine, Etoposide | 2008, Hey, SKOV3, OVCA 420, OVCA 433                                | -                                                                                        | -                       | TUBB3                          | 107  |
| miR-200c-with nuclear HuR                                                                                                | -              | Cisplatin, Taxol, Patupilone                                       | -                                                                   | OvCa patients                                                                            | Yes                     | -                              | 113  |
| miR-204-5p                                                                                                               | -              | Cisplatin                                                          | A2780, SKOV3, OVCAR3, OV2008, C13*                                  | Epithelial OvCa                                                                          | Yes                     | IL-6R                          | 73   |
| miR-215                                                                                                                  | -              | Taxol                                                              | OVCAR3, CAOV3, SKOV3, HEY                                           | Epithelial OvCa                                                                          | Yes                     | XIAP                           | 74   |
| miR-216b-5p                                                                                                              | -              | Cisplatin                                                          | SKOV3, SKOV3/CDDP                                                   | OvCa                                                                                     | Yes                     | PARP1                          | 75   |
| miR-335                                                                                                                  | -              | -                                                                  | -                                                                   | Epithelial OvCa                                                                          | Yes                     | -                              | 108  |
| miR-335-5p                                                                                                               | 8 other miRNAs | Cisplatin                                                          | A2780, A2780/DDP, OV90, OVCAR-3,                                    | -                                                                                        | -                       | BCL2L2                         | 76   |
| miR-338-3p                                                                                                               | -              | Cisplatin                                                          | A2780, A2780/DDP, SKOV3, SKOV3/CDDP                                 | PrimaryOvCa                                                                              | Yes                     | WNT2B                          | 77   |
| miR-363-3p                                                                                                               | -              | Cisplatin                                                          | OV2008, A2780, C13, A2780cp                                         | OvCa                                                                                     | Yes                     | Snail                          | 78   |
| miR-370-3p                                                                                                               | -              | Cisplatin                                                          | SKOV3, UWB1.289, HEY, OV2008, IGROV1, TOV112D, ES-2, TOV21G         | Endometriod OvCa                                                                         | Yes                     | ENG                            | 109  |
| miR-378a-3p                                                                                                              | -              | Cisplatin                                                          | OVCAR3, SKOV3                                                       | OvCa                                                                                     | Yes                     | MAPK1, GRB2                    | 79   |
| miR-383-5p                                                                                                               | -              | Taxol                                                              | SKOV3, A2780, OVCAR-3, Caov-3                                       | OvCa                                                                                     | Yes                     | TRIM27                         | 80   |
| miR-411-5p                                                                                                               | -              | Cisplatin, Taxol                                                   | SKOV3, OVCAR3                                                       | Primary OvCa                                                                             | Yes                     | ABCG2                          | 81   |
| miR-429                                                                                                                  | -              | Cisplatin                                                          | OVCAR3 & Hey                                                        | -                                                                                        | -                       | -                              | 112  |
| miR-449a                                                                                                                 | -              | Cisplatin                                                          | A2780, A2780/CDDP, SKOV3, SKOV3/CDDP                                | -                                                                                        | -                       | NOTCH1                         | 110  |
| miR-489-3p                                                                                                               | -              | Cisplatin                                                          | SKOV3, OVCAR3, SKOV3/CDDP, OVCAR3/CDDP                              | -                                                                                        | -                       | Akt3                           | 82   |
| miR-490-3p                                                                                                               | -              | Cisplatin                                                          | SKOV3, OVCAR3, SKOV3/CDDP, OVCAR3/CDDP                              | OvCa                                                                                     | Yes                     | ABCC2                          | 83   |
| miR-497-5p                                                                                                               | 9 other miRNAs | Cisplatin                                                          | A2780, A2780/CP, SKOV3, SKOV3/CP                                    | OvCa                                                                                     | Yes                     | mTOR, P70S6K1                  | 84   |
| miR-503                                                                                                                  | -              | Cisplatin                                                          | SKOV3, SKOV3/DDP                                                    | -                                                                                        | -                       | PI3K p85                       | 85   |
| miR-503-5p                                                                                                               | -              | Taxol                                                              | CaOV3, SKOV3, OVCAR3, OV90, CaOV3/PTX-R, SKOV3/PTX-R                | -                                                                                        | -                       | CD97                           | 86   |
| miR-506-3p                                                                                                               | -              | Cisplatin, Olaparib                                                | HeyA8, OVCA433, SKOV3                                               | Serous OvCa                                                                              | Yes                     | RAD-51                         | 111  |
| miR-509-3p                                                                                                               | -              | Cisplatin                                                          | SKOV3                                                               | OvCa tissue                                                                              | Yes                     | GOLPH3, WLS                    | 87   |
| miR-514-5p                                                                                                               | -              | Cisplatin                                                          | SKOV3, OVCA433                                                      | NCBI's GEO datasets                                                                      | Yes                     | ATP binding cassette subfamily | 88   |
| miR-591                                                                                                                  | miR-106a-5p    | Taxol                                                              | SKOV3 and PTX resistant SKOV3 sublines                              | Epithelial OvCa                                                                          | Yes                     | ZEB1                           | 10   |
| miR-708-5p                                                                                                               | -              | Cisplatin                                                          | A2780, A2780/DDP, SKOV3, SKOV3/CDDP                                 | -                                                                                        | -                       | IGF2BP1                        | 90   |
| miR-770-5p                                                                                                               | -              | Cisplatin                                                          | OV2008, A2780, C13, A2780cp                                         | Epithelial OvCa                                                                          | Yes                     | ERCC2                          | 91   |
| miR-873                                                                                                                  | -              | Cisplatin, Taxol                                                   | A2780, A2780/DDP, A2780/Taxol, OVCAR3                               | -                                                                                        | -                       | ABCB1                          | 30   |
| miR-874-5p, miR-874-3p                                                                                                   | -              | Taxol                                                              | Caov3, SKOV3                                                        | Epithelial OvCa                                                                          | Yes                     | SIK2                           | 92   |
| miR-1294                                                                                                                 | -              | Cisplatin                                                          | SKOV3                                                               | Advanced stage OvCa                                                                      | Yes                     | IGF1R                          | 31   |
| let-7d-3p                                                                                                                | let-7a         | Taxol, Carboplatin                                                 | SKOV-3                                                              | High grade serous, endometrioid, mucinous, serous papillary low grade or clear cell OvCa | Yes                     | -                              | 34   |
| let-7e-5p                                                                                                                | -              | Cisplatin                                                          | A2780, HO8910, ES2, CAOV3, SKOV3                                    | Serous epithelial OvCa                                                                   | Yes                     | BRCA1, Rad51                   | 35   |
| let-7e                                                                                                                   | -              | Cisplatin                                                          | A2780, ES2, SKOV3, A2780/CP                                         | -                                                                                        | -                       | -                              | 102  |
| let-7g                                                                                                                   | let-7d         | Taxol, Carboplatin, Vinblastine                                    | ADR-RES, OVCAR-8, T47D, IGROV1                                      | Epithelial OvCa                                                                          | Yes                     | MDR1, IMP-1                    | 36   |

**Supplemental Table S2:** List of miRNAs shown to either sensitize OC to therapy or associated with positive treatment outcome in OC. Each row consists of a main miRNA and other miRNAs studied in a published article as well as other details from the study.

## References Supplemental Table S1 and S2

1. Zhu H, Yang SY, Wang J, Wang L, Han SY. Evidence for miR-17-92 and miR-134 gene cluster regulation of ovarian cancer drug resistance. *Eur Rev Med Pharmacol Sci* **2016**;20:2526-31
2. Vandghanooni S, Eskandani M, Barar J, Omid Y. AS1411 aptamer-decorated cisplatin-loaded poly(lactic-co-glycolic acid) nanoparticles for targeted therapy of miR-21-inhibited ovarian cancer cells. *Nanomedicine* **2018**;13:2729-58
3. Pink RC, Samuel P, Massa D, Caley DP, Brooks SA, Carter DR. The passenger strand, miR-21-3p, plays a role in mediating cisplatin resistance in ovarian cancer cells. *Gynecol Oncol* **2015**;137:143-51
4. Au Yeung CL, Co NN, Tsuruga T, Yeung TL, Kwan SY, Leung CS, *et al.* Exosomal transfer of stroma-derived miR21 confers paclitaxel resistance in ovarian cancer cells through targeting APAF1. *Nat Commun* **2016**;7:11150
5. Chan JK, Blansit K, Kiet T, Sherman A, Wong G, Earle C, *et al.* The inhibition of miR-21 promotes apoptosis and chemosensitivity in ovarian cancer. *Gynecol Oncol* **2014**;132:739-44
6. Echevarría-Vargas IM, Valiyeva F, Vivas-Mejía PE. Upregulation of miR-21 in cisplatin resistant ovarian cancer via JNK-1/c-Jun pathway. *PLoS One* **2014**;9:e97094
7. Li Z, Hu S, Wang J, Cai J, Xiao L, Yu L, *et al.* MiR-27a modulates MDR1/P-glycoprotein expression by targeting HIPK2 in human ovarian cancer cells. *Gynecol Oncol* **2010**;119:125-30
8. Samuel P, Pink RC, Caley DP, Currie JM, Brooks SA, Carter DR. Over-expression of miR-31 or loss of KCNMA1 leads to increased cisplatin resistance in ovarian cancer cells. *Tumour Biol* **2016**;37:2565-73
9. Wang Y, Bao W, Liu Y, Wang S, Xu S, Li X, *et al.* miR-98-5p contributes to cisplatin resistance in epithelial ovarian cancer by suppressing miR-152 biogenesis via targeting Dicer1. *Cell Death Dis* **2018**;9:447
10. Huh JH, Kim TH, Kim K, Song JA, Jung YJ, Jeong JY, *et al.* Dysregulation of miR-106a and miR-591 confers paclitaxel resistance to ovarian cancer. *Br J Cancer* **2013**;109:452-61
11. Kong F, Sun C, Wang Z, Han L, Weng D, Lu Y, *et al.* miR-125b confers resistance of ovarian cancer cells to cisplatin by targeting pro-apoptotic Bcl-2 antagonist killer 1. *J Huazhong Univ Sci Tech Med Sci* **2011**;31:543
12. Wang J, Ye C, Liu J, Hu Y. UCA1 confers paclitaxel resistance to ovarian cancer through miR-129/ABCB1 axis. *Biochem Biophys Res Commun* **2018**;501:1034-40
13. Li N, Yang L, Wang H, Yi T, Jia X, Chen C, *et al.* MiR-130a and MiR-374a Function as Novel Regulators of Cisplatin Resistance in Human Ovarian Cancer A2780 Cells. *PLoS One* **2015**;10:e0128886
14. Yang L, Li N, Wang H, Jia X, Wang X, Luo J. Altered microRNA expression in cisplatin-resistant ovarian cancer cells and upregulation of miR-130a associated with MDR1/P-glycoprotein-mediated drug resistance. *Oncol Rep* **2012**;28:592-600
15. Sorrentino A, Liu CG, Addario A, Peschle C, Scambia G, Ferlini C. Role of microRNAs in drug-resistant ovarian cancer cells. *Gynecol Oncol* **2008**;111:478-86
16. van Jaarsveld MT, Helleman J, Boersma AW, van Kuijk PF, van Ijcken WF, Despierre E, *et al.* miR-141 regulates KEAP1 and modulates cisplatin sensitivity in ovarian cancer cells. *Oncogene* **2013**;32:4284-93
17. Zhu X, Li Y, Xie C, Yin X, Liu Y, Cao Y, *et al.* miR-145 sensitizes ovarian cancer cells to paclitaxel by targeting Sp1 and Cdk6. *Int J Cancer* **2014**;135:1286-96
18. Xu M, Xiao J, Chen M, Yuan L, Li J, Shen H, *et al.* miR-149-5p promotes chemotherapeutic resistance in ovarian cancer via the inactivation of the Hippo signaling pathway. *Int J Oncol* **2018**;52:815-27
19. Zhan Y, Xiang F, Wu R, Xu J, Ni Z, Jiang J, *et al.* MiRNA-149 modulates chemosensitivity of ovarian cancer A2780 cells to paclitaxel by targeting MyD88. *J Ovarian Res* **2015**;8:48

20. Zou D, Wang D, Li R, Tang Y, Yuan L, Long X, *et al.* MiR-197 induces Taxol resistance in human ovarian cancer cells by regulating NLK. *Tumour Biol* **2015**;36:6725-32
21. Zhang J, Liu J, Xu X, Li L. Curcumin suppresses cisplatin resistance development partly via modulating extracellular vesicle-mediated transfer of MEG3 and miR-214 in ovarian cancer. *Cancer Chemother Pharmacol* **2017**;79:479-87
22. Jin P, Liu Y, Wang R. STAT3 regulated miR-216a promotes ovarian cancer proliferation and cisplatin resistance. *Biosci Rep* **2018**;38
23. Zhao H, Bi T, Qu Z, Jiang J, Cui S, Wang Y. Expression of miR-224-5p is associated with the original cisplatin resistance of ovarian papillary serous carcinoma. *Oncol Rep* **2014**;32:1003-12
24. Mohamed Z, Hassan MK, Okasha S, Mitamura T, Keshk S, Konno Y, *et al.* miR-363 confers taxane resistance in ovarian cancer by targeting the Hippo pathway member, LATS2. *Oncotarget* **2018**;9:30053-65
25. Weiner-Gorzel K, Dempsey E, Milewska M, McGoldrick A, Toh V, Walsh A, *et al.* Overexpression of the microRNA miR-433 promotes resistance to paclitaxel through the induction of cellular senescence in ovarian cancer cells. *Cancer Med* **2015**;4:745-58
26. Tambe M, Pruikkonen S, Mäki-Jouppila J, Chen P, Elgaaen BV, Straume AH, *et al.* Novel Mad2-targeting miR-493-3p controls mitotic fidelity and cancer cells' sensitivity to paclitaxel. *Oncotarget* **2016**;7:12267-85
27. Meghani K, Fuchs W, Detappe A, Drané P, Gogola E, Rottenberg S, *et al.* Multifaceted Impact of MicroRNA 493-5p on Genome-Stabilizing Pathways Induces Platinum and PARP Inhibitor Resistance in BRCA2-Mutated Carcinomas. *Cell Rep* **2018**;23:100-11
28. Wei Z, Liu Y, Wang Y, Zhang Y, Luo Q, Man X, *et al.* Downregulation of Foxo3 and TRIM31 by miR-551b in side population promotes cell proliferation, invasion, and drug resistance of ovarian cancer. *Med Oncol* **2016**;33:126
29. Eoh KJ, Lee SH, Kim HJ, Lee JY, Kim S, Kim SW, *et al.* MicroRNA-630 inhibitor sensitizes chemoresistant ovarian cancer to chemotherapy by enhancing apoptosis. *Biochem Biophys Res Commun* **2018**;497:513-20
30. Wu DD, Li XS, Meng XN, Yan J, Zong ZH. MicroRNA-873 mediates multidrug resistance in ovarian cancer cells by targeting ABCB1. *Tumour Biol* **2016**;37:10499-506
31. Zhang Y, Huang S, Guo Y, Li L. MiR-1294 confers cisplatin resistance in ovarian Cancer cells by targeting IGF1R. *Biomed Pharmacother* **2018**;106:1357-63
32. Zhou Y, Wang M, Wu J, Jie Z, Chang S, Shuang T. The clinicopathological significance of miR-1307 in chemotherapy resistant epithelial ovarian cancer. *J Ovarian Res* **2015**;8:23
33. Chen WT, Yang YJ, Zhang ZD, An Q, Li N, Liu W, *et al.* MiR-1307 promotes ovarian cancer cell chemoresistance by targeting the ING5 expression. *J Ovarian Res* **2017**;10:1
34. García-Vázquez R, Gallardo Rincón D, Ruiz-García E, Meneses García A, Hernández De La Cruz ON, Astudillo-De La Vega H, *et al.* let-7d-3p is associated with apoptosis and response to neoadjuvant chemotherapy in ovarian cancer. *Oncol Rep* **2018**;39:3086-94
35. Xiao M, Cai J, Cai L, Jia J, Xie L, Zhu Y, *et al.* Let-7e sensitizes epithelial ovarian cancer to cisplatin through repressing DNA double strand break repair. *J Ovarian Res* **2017**;10:24
36. Boyerinas B, Park SM, Murmann AE, Gwin K, Montag AG, Zillhardt M, *et al.* Let-7 modulates acquired resistance of ovarian cancer to Taxanes via IMP-1-mediated stabilization of multidrug resistance 1. *Int J Cancer* **2012**;130:1787-97
37. Yu PN, Yan MD, Lai HC, Huang RL, Chou YC, Lin WC, *et al.* Downregulation of miR-29 contributes to cisplatin resistance of ovarian cancer cells. *Int J Cancer* **2014**;134:542-51
38. Dai F, Zhang Y, Chen Y. Involvement of miR-29b signaling in the sensitivity to chemotherapy in patients with ovarian carcinoma. *Hum Pathol* **2014**;45:1285-93
39. Sugio A, Iwasaki M, Habata S, Mariya T, Suzuki M, Osogami H, *et al.* BAG3 upregulates Mcl-1 through downregulation of miR-29b to induce anticancer drug resistance in ovarian cancer. *Gynecol Oncol* **2014**;134:615-23
40. Mitamura T, Watari H, Wang L, Kanno H, Hassan MK, Miyazaki M, *et al.* Downregulation of miRNA-31 induces taxane resistance in ovarian cancer cells through increase of receptor tyrosine kinase MET. *Oncogenesis* **2013**;2:e40

41. Tung SL, Huang WC, Hsu FC, Yang ZP, Jang TH, Chang JW, *et al.* miRNA-34c-5p inhibits amphiregulin-induced ovarian cancer stemness and drug resistance via downregulation of the AREG-EGFR-ERK pathway. *Oncogenesis* **2017**;6:e326
42. Rodriguez-Aguayo C, Monroig PDC, Redis RS, Bayraktar E, Almeida MI, Ivan C, *et al.* Regulation of hnRNPA1 by microRNAs controls the miR-18a-K-RAS axis in chemotherapy-resistant ovarian cancer. *Cell Discov* **2017**;3:17029
43. Cui X, Sun Y, Shen M, Song K, Yin X, Di W, *et al.* Enhanced Chemotherapeutic Efficacy of Paclitaxel Nanoparticles Co-delivered with MicroRNA-7 by Inhibiting Paclitaxel-Induced EGFR/ERK pathway Activation for Ovarian Cancer Therapy. *ACS Appl Mater Interfaces* **2018**;10:7821-31
44. Zhao HM, Wei W, Sun YH, Gao JH, Wang Q, Zheng JH. MicroRNA-9 promotes tumorigenesis and mediates sensitivity to cisplatin in primary epithelial ovarian cancer cells. *Tumour Biol* **2015**;36:6867-73
45. Sun C, Li N, Yang Z, Zhou B, He Y, Weng D, *et al.* miR-9 regulation of BRCA1 and ovarian cancer sensitivity to cisplatin and PARP inhibition. *J Natl Cancer Inst* **2013**;105:1750-8
46. Dwivedi SK, Mustafi SB, Mangala LS, Jiang D, Pradeep S, Rodriguez-Aguayo C, *et al.* Therapeutic evaluation of microRNA-15a and microRNA-16 in ovarian cancer. *Oncotarget* **2016**;7:15093-104
47. Guo P, Xiong X, Zhang S, Peng D. miR-100 resensitizes resistant epithelial ovarian cancer to cisplatin. *Oncol Rep* **2016**;36:3552-8
48. Liu L, Guo J, Yu L, Cai J, Gui T, Tang H, *et al.* miR-101 regulates expression of EZH2 and contributes to progression of and cisplatin resistance in epithelial ovarian cancer. *Tumour Biol* **2014**;35:12619-26
49. Rao YM, Shi HR, Ji M, Chen CH. MiR-106a targets Mcl-1 to suppress cisplatin resistance of ovarian cancer A2780 cells. *J Huazhong Univ Sci Technol Med Sci* **2013**;33:567-72
50. Li B, Chen H, Wu N, Zhang WJ, Shang LX. Deregulation of miR-128 in ovarian cancer promotes cisplatin resistance. *Int J Gynecol Cancer* **2014**;24:1381-8
51. Yang C, Cai J, Wang Q, Tang H, Cao J, Wu L, *et al.* Epigenetic silencing of miR-130b in ovarian cancer promotes the development of multidrug resistance by targeting colony-stimulating factor 1. *Gynecol Oncol* **2012**;124:325-34
52. Chen S, Jiao JW, Sun KX, Zong ZH, Zhao Y. MicroRNA-133b targets glutathione S-transferase  $\pi$  expression to increase ovarian cancer cell sensitivity to chemotherapy drugs. *Drug Des Devel Ther* **2015**;9:5225-35
53. Shuang T, Wang M, Zhou Y, Shi C, Wang D. NF- $\kappa$ B1, c-Rel, and ELK1 inhibit miR-134 expression leading to TAB1 upregulation in paclitaxel-resistant human ovarian cancer. *Oncotarget* **2017**;8:24853-68
54. Shuang T, Wang M, Shi C, Zhou Y, Wang D. Down-regulated expression of miR-134 contributes to paclitaxel resistance in human ovarian cancer cells. *FEBS Lett* **2015**;589:3154-64
55. Zhao H, Liu S, Wang G, Wu X, Ding Y, Guo G, *et al.* Expression of miR-136 is associated with the primary cisplatin resistance of human epithelial ovarian cancer. *Oncol Rep* **2015**;33:591-8
56. Sun J, Cai X, Yung MM, Zhou W, Li J, Zhang Y, *et al.* miR-137 mediates the functional link between c-Myc and EZH2 that regulates cisplatin resistance in ovarian cancer. *Oncogene* **2019**;38:564-80
57. Xiao F, Li Y, Wan Y, Xue M. MicroRNA-139 sensitizes ovarian cancer cell to cisplatin-based chemotherapy through regulation of ATP7A/B. *Cancer Chemother Pharmacol* **2018**;81:935-47
58. Jiang Y, Jiang J, Jia H, Qiao Z, Zhang J. Recovery of miR-139-5p in Ovarian Cancer Reverses Cisplatin Resistance by Targeting C-Jun. *Cell Physiol Biochem* **2018**;51:129-41
59. Li X, Chen W, Jin Y, Xue R, Su J, Mu Z, *et al.* miR-142-5p enhances cisplatin-induced apoptosis in ovarian cancer cells by targeting multiple anti-apoptotic genes. *Biochem Pharmacol* **2019**;161:98-112
60. Li X, Jin Y, Mu Z, Chen W, Jiang S. MicroRNA-146a-5p enhances cisplatin-induced apoptosis in ovarian cancer cells by targeting multiple anti-apoptotic genes. *Int J Oncol* **2017**;51:327-35



61. Yan M, Yang X, Shen R, Wu C, Wang H, Ye Q, *et al.* miR-146b promotes cell proliferation and increases chemosensitivity, but attenuates cell migration and invasion via FBXL10 in ovarian cancer. *Cell Death Dis* **2018**;9:1123
62. Xiang Y, Ma N, Wang D, Zhang Y, Zhou J, Wu G, *et al.* MiR-152 and miR-185 co-contribute to ovarian cancer cells cisplatin sensitivity by targeting DNMT1 directly: a novel epigenetic therapy independent of decitabine. *Oncogene* **2014**;33:378-86
63. Chen W, Huang L, Hao C, Zeng W, Luo X, Li X, *et al.* MicroRNA-155 promotes apoptosis in SKOV3, A2780, and primary cultured ovarian cancer cells. *Tumour Biol* **2016**;37:9289-99
64. Ramalho S, Andrade LAA, Filho CC, Natal RA, Pavanello M, Ferracini AC, *et al.* Role of discoidin domain receptor 2 (DDR2) and microRNA-182 in survival of women with high-grade serous ovarian cancer. *Tumour Biol* **2019**;41:1010428318823988
65. Zhu X, Shen H, Yin X, Long L, Xie C, Liu Y, *et al.* miR-186 regulation of Twist1 and ovarian cancer sensitivity to cisplatin. *Oncogene* **2016**;35:323-32
66. Sun KX, Jiao JW, Chen S, Liu BL, Zhao Y. MicroRNA-186 induces sensitivity of ovarian cancer cells to paclitaxel and cisplatin by targeting ABCB1. *J Ovarian Res* **2015**;8:80
67. Cheng W, Liu T, Wan X, Gao Y, Wang H. MicroRNA-199a targets CD44 to suppress the tumorigenicity and multidrug resistance of ovarian cancer-initiating cells. *Febs j* **2012**;279:2047-59
68. Cui Y, Wu F, Tian D, Wang T, Lu T, Huang X, *et al.* miR-199a-3p enhances cisplatin sensitivity of ovarian cancer cells by targeting ITGB8. *Oncol Rep* **2018**;39:1649-57
69. Liu MX, Siu MK, Liu SS, Yam JW, Ngan HY, Chan DW. Epigenetic silencing of microRNA-199b-5p is associated with acquired chemoresistance via activation of JAG1-Notch1 signaling in ovarian cancer. *Oncotarget* **2014**;5:944-58
70. Liu J, Zhang X, Huang Y, Zhang Q, Zhou J, Zhang X, *et al.* miR-200b and miR-200c co-contribute to the cisplatin sensitivity of ovarian cancer cells by targeting DNA methyltransferases. *Oncol Lett* **2019**;17:1453-60
71. Cittelly DM, Dimitrova I, Howe EN, Cochrane DR, Jean A, Spoelstra NS, *et al.* Restoration of miR-200c to ovarian cancer reduces tumor burden and increases sensitivity to paclitaxel. *Mol Cancer Ther* **2012**;11:2556-65
72. Vescarelli E, Gerini G, Megiorni F, Anastasiadou E, Pontecorvi P, Solito L, *et al.* MiR-200c sensitizes Olaparib-resistant ovarian cancer cells by targeting Neuropilin 1. *J Exp Clin Cancer Res* **2020**;39:3
73. Zhu X, Shen H, Yin X, Long L, Chen X, Feng F, *et al.* IL-6R/STAT3/miR-204 feedback loop contributes to cisplatin resistance of epithelial ovarian cancer cells. *Oncotarget* **2017**;8:39154-66
74. Ge G, Zhang W, Niu L, Yan Y, Ren Y, Zou Y. miR-215 functions as a tumor suppressor in epithelial ovarian cancer through regulation of the X-chromosome-linked inhibitor of apoptosis. *Oncol Rep* **2016**;35:1816-22
75. Liu Y, Niu Z, Lin X, Tian Y. MiR-216b increases cisplatin sensitivity in ovarian cancer cells by targeting PARP1. *Cancer Gene Ther* **2017**;24:208-14
76. Liu R, Guo H, Lu S. MiR-335-5p restores cisplatin sensitivity in ovarian cancer cells through targeting BCL2L2. *Cancer Med* **2018**;7:4598-609
77. Niu Q, Liu Z, Gao J, Wang Q. MiR-338-3p Enhances Ovarian Cancer Cell Sensitivity to Cisplatin by Downregulating WNT2B. *Yonsei Med J* **2019**;60:1146-56
78. Cao L, Wan Q, Li F, Tang CE. MiR-363 inhibits cisplatin chemoresistance of epithelial ovarian cancer by regulating snail-induced epithelial-mesenchymal transition. *BMB Rep* **2018**;51:456-61
79. Xu ZH, Yao TZ, Liu W. miR-378a-3p sensitizes ovarian cancer cells to cisplatin through targeting MAPK1/GRB2. *Biomed Pharmacother* **2018**;107:1410-7
80. Jiang J, Xie C, Liu Y, Shi Q, Chen Y. Up-regulation of miR-383-5p suppresses proliferation and enhances chemosensitivity in ovarian cancer cells by targeting TRIM27. *Biomed Pharmacother* **2019**;109:595-601

81. Chen FD, Chen HH, Ke SC, Zheng LR, Zheng XY. SLC27A2 regulates miR-411 to affect chemo-resistance in ovarian cancer. *Neoplasma* **2018**;65:915-24
82. Wu H, Xiao Z, Zhang H, Wang K, Liu W, Hao Q. MiR-489 modulates cisplatin resistance in human ovarian cancer cells by targeting Akt3. *Anticancer Drugs* **2014**;25:799-809
83. Tian J, Xu YY, Li L, Hao Q. MiR-490-3p sensitizes ovarian cancer cells to cisplatin by directly targeting ABCC2. *American journal of translational research* **2017**;9:1127-38
84. Xu S, Fu GB, Tao Z, OuYang J, Kong F, Jiang BH, *et al.* MiR-497 decreases cisplatin resistance in ovarian cancer cells by targeting mTOR/P70S6K1. *Oncotarget* **2015**;6:26457-71
85. Wu D, Lu P, Mi X, Miao J. Downregulation of miR-503 contributes to the development of drug resistance in ovarian cancer by targeting PI3K p85. *Arch Gynecol Obstet* **2018**;297:699-707
86. Park GB, Kim D. MicroRNA-503-5p Inhibits the CD97-Mediated JAK2/STAT3 Pathway in Metastatic or Paclitaxel-Resistant Ovarian Cancer Cells. *Neoplasia* **2019**;21:206-15
87. Niu L, Ni H, Hou Y, Du Q, Li H. miR-509-3p enhances platinum drug sensitivity in ovarian cancer. *Gene* **2019**;686:63-7
88. Xiao S, Zhang M, Liu C, Wang D. MiR-514 attenuates proliferation and increases chemoresistance by targeting ATP binding cassette subfamily in ovarian cancer. *Mol Genet Genomics* **2018**;293:1159-67
89. Vigneron N, Vernon M, Meryet-Figuière M, Lambert B, Briand M, Louis MH, *et al.* Predictive Relevance of Circulating miR-622 in Patients with Newly Diagnosed and Recurrent High-Grade Serous Ovarian Carcinoma. *Clin Chem* **2020**;66:352-62
90. Qin X, Sun L, Wang J. Restoration of microRNA-708 sensitizes ovarian cancer cells to cisplatin via IGF2BP1/Akt pathway. *Cell Biol Int* **2017**;41:1110-8
91. Zhao H, Yu X, Ding Y, Zhao J, Wang G, Wu X, *et al.* MiR-770-5p inhibits cisplatin chemoresistance in human ovarian cancer by targeting ERCC2. *Oncotarget* **2016**;7:53254-68
92. Xia B, Lin M, Dong W, Chen H, Li B, Zhang X, *et al.* Upregulation of miR-874-3p and miR-874-5p inhibits epithelial ovarian cancer malignancy via SIK2. *J Biochem Mol Toxicol* **2018**;32:e22168
93. Fang Y, Xu C, Fu Y. MicroRNA-17-5p induces drug resistance and invasion of ovarian carcinoma cells by targeting PTEN signaling. *J Biol Res (Thessalon)* **2015**;22:12
94. Fu X, Tian J, Zhang L, Chen Y, Hao Q. Involvement of microRNA-93, a new regulator of PTEN/Akt signaling pathway, in regulation of chemotherapeutic drug cisplatin chemosensitivity in ovarian cancer cells. *FEBS Lett* **2012**;586:1279-86
95. Li H, Xu H, Shen H, Li H. microRNA-106a modulates cisplatin sensitivity by targeting PDCD4 in human ovarian cancer cells. *Oncol Lett* **2014**;7:183-8
96. Zong C, Wang J, Shi TM. MicroRNA 130b enhances drug resistance in human ovarian cancer cells. *Tumour Biol* **2014**;35:12151-6
97. Yang H, Kong W, He L, Zhao JJ, O'Donnell JD, Wang J, *et al.* MicroRNA expression profiling in human ovarian cancer: miR-214 induces cell survival and cisplatin resistance by targeting PTEN. *Cancer Res* **2008**;68:425-33
98. Ye G, Fu G, Cui S, Zhao S, Bernaudo S, Bai Y, *et al.* MicroRNA 376c enhances ovarian cancer cell survival by targeting activin receptor-like kinase 7: implications for chemoresistance. *J Cell Sci* **2011**;124:359-68
99. Arrighetti N, Cossa G, De Cecco L, Stucchi S, Carenini N, Corna E, *et al.* PKC-alpha modulation by miR-483-3p in platinum-resistant ovarian carcinoma cells. *Toxicol Appl Pharmacol* **2016**;310:9-19
100. Chen S, Chen X, Xiu YL, Sun KX, Zong ZH, Zhao Y. microRNA 490-3P enhances the drug-resistance of human ovarian cancer cells. *J Ovarian Res* **2014**;7:84
101. Choi YE, Meghani K, Brault ME, Leclerc L, He YJ, Day TA, *et al.* Platinum and PARP Inhibitor Resistance Due to Overexpression of MicroRNA-622 in BRCA1-Mutant Ovarian Cancer. *Cell Rep* **2016**;14:429-39

102. Cai J, Yang C, Yang Q, Ding H, Jia J, Guo J, *et al.* Deregulation of let-7e in epithelial ovarian cancer promotes the development of resistance to cisplatin. *Oncogenesis* **2013**;2:e75
103. Han X, Zhen S, Ye Z, Lu J, Wang L, Li P, *et al.* A Feedback Loop Between miR-30a/c-5p and DNMT1 Mediates Cisplatin Resistance in Ovarian Cancer Cells. *Cell Physiol Biochem* **2017**;41:973-86
104. Zhang X, Huang L, Zhao Y, Tan W. Downregulation of miR-130a contributes to cisplatin resistance in ovarian cancer cells by targeting X-linked inhibitor of apoptosis (XIAP) directly. *Acta Biochim Biophys Sin (Shanghai)* **2013**;45:995-1001
105. Jeong JY, Kang H, Kim TH, Kim G, Heo JH, Kwon AY, *et al.* MicroRNA-136 inhibits cancer stem cell activity and enhances the anti-tumor effect of paclitaxel against chemoresistant ovarian cancer cells by targeting Notch3. *Cancer Lett* **2017**;386:168-78
106. Deng Y, Zhao F, Hui L, Li X, Zhang D, Lin W, *et al.* Suppressing miR-199a-3p by promoter methylation contributes to tumor aggressiveness and cisplatin resistance of ovarian cancer through promoting DDR1 expression. *J Ovarian Res* **2017**;10:50
107. Cochrane DR, Spoelstra NS, Howe EN, Nordeen SK, Richer JK. MicroRNA-200c mitigates invasiveness and restores sensitivity to microtubule-targeting chemotherapeutic agents. *Mol Cancer Ther* **2009**;8:1055-66
108. Cao J, Cai J, Huang D, Han Q, Chen Y, Yang Q, *et al.* miR-335 represents an independent prognostic marker in epithelial ovarian cancer. *Am J Clin Pathol* **2014**;141:437-42
109. Chen XP, Chen YG, Lan JY, Shen ZJ. MicroRNA-370 suppresses proliferation and promotes endometrioid ovarian cancer chemosensitivity to cDDP by negatively regulating ENG. *Cancer Lett* **2014**;353:201-10
110. Zhou Y, Chen Q, Qin R, Zhang K, Li H. MicroRNA-449a reduces cell survival and enhances cisplatin-induced cytotoxicity via downregulation of NOTCH1 in ovarian cancer cells. *Tumour Biol* **2014**;35:12369-78
111. Liu G, Yang D, Rupaimoole R, Pecot CV, Sun Y, Mangala LS, *et al.* Augmentation of response to chemotherapy by microRNA-506 through regulation of RAD51 in serous ovarian cancers. *J Natl Cancer Inst* **2015**;107
112. Wang L, Mezencev R, Švajdler M, Benigno BB, McDonald JF. Ectopic over-expression of miR-429 induces mesenchymal-to-epithelial transition (MET) and increased drug sensitivity in metastasizing ovarian cancer cells. *Gynecol Oncol* **2014**;134:96-103
113. Prislei S, Martinelli E, Mariani M, Raspaglio G, Sieber S, Ferrandina G, *et al.* MiR-200c and HuR in ovarian cancer. *BMC Cancer* **2013**;13:72
114. Leskelä S, Leandro-García LJ, Mendiola M, Barriuso J, Inglada-Pérez L, Muñoz I, *et al.* The miR-200 family controls beta-tubulin III expression and is associated with paclitaxel-based treatment response and progression-free survival in ovarian cancer patients. *Endocr Relat Cancer* **2011**;18:85-95
115. Liu N, Zhong L, Zeng J, Zhang X, Yang Q, Liao D, *et al.* Upregulation of microRNA-200a associates with tumor proliferation, CSCs phenotype and chemosensitivity in ovarian cancer. *Neoplasia* **2015**;62:550-9
116. Mateescu B, Batista L, Cardon M, Gruosso T, de Feraudy Y, Mariani O, *et al.* miR-141 and miR-200a act on ovarian tumorigenesis by controlling oxidative stress response. *Nat Med* **2011**;17:1627-35
117. Zhang J, Liu L, Sun Y, Xiang J, Zhou D, Wang L, *et al.* MicroRNA-520g promotes epithelial ovarian cancer progression and chemoresistance via DAPK2 repression. *Oncotarget* **2016**;7:26516-34
